1        **Disentangling reward processes underlying payoff maximization**  
2                    **from individual differences in gain frequency bias and**  
3                    **reinforcement learning**  
4

5        Pragathi Priyadharsini Balasubramani<sup>1\*</sup>, Juan Diaz-Delgado<sup>1</sup>, Gillian Grennan<sup>1</sup>, Fahad Alim<sup>1</sup>,  
6                    Mariam Zafar-Khan<sup>1</sup>, Vojislav Maric<sup>1</sup>, Dhakshin Ramanathan<sup>1,2</sup>, Jyoti Mishra<sup>1\*</sup>

7        <sup>1</sup>Neural Engineering and Translation Labs, Department of Psychiatry, University of California,  
8                    San Diego, La Jolla, CA, USA

9                    <sup>2</sup>Department of Mental Health, VA San Diego Medical Center, San Diego, CA

10  
11  
12        \*Correspondence should be addressed to:

13        Pragathi Priyadharsini Balasubramani & Jyoti Mishra

14        University of California, San Diego

15        Neural Engineering & Translation Labs (NEAT Labs)

16        9500 Gilman Drive Mail Code 0875

17        La Jolla, CA 92037

18        [pbalasubramani@health.ucsd.edu](mailto:pbalasubramani@health.ucsd.edu) & [jymishra@health.ucsd.edu](mailto:jymishra@health.ucsd.edu)

19  
20  
21  
22        Total Figures: 3

23        Total Words: 2941, Introduction (431), Results (1606), Discussion (904).

24

## 25 **Abstract**

26 Humans make choices based on both reward magnitude and reward frequency.  
27 Probabilistic decision making is popularly tested using multi-choice gambling paradigms that  
28 require participants to maximize task payoff. However, research shows that performance in such  
29 paradigms suffers from individual bias towards the frequency of gains as well as individual  
30 differences that mediate reinforcement learning, including attention to stimuli, sensitivity to  
31 rewards and risks, learning rate, and exploration vs. exploitation based executive policies. Here,  
32 we developed a two-choice reward task, implemented in 186 healthy human subjects across the  
33 adult lifespan, to understand the cognitive and neural basis of payoff-based performance. We  
34 controlled for individual gain frequency biases using experimental block manipulations and  
35 modeled individual differences in reinforcement learning parameters. Simultaneously recorded  
36 electroencephalography (EEG)-based cortical activations showed that diminished theta activity in  
37 the right rostral anterior cingulate cortex (ACC) as well as diminished beta activity in the right  
38 parsorbitalis region of the inferior frontal cortex (IFC) during cumulative reward presentation  
39 correspond to better payoff performance. These neural activations further associated with specific  
40 symptom self-reports for depression (greater ACC theta) and inattention (greater IFC beta),  
41 suggestive of reward processing markers of clinical utility.

42

43 **Keywords:** reward, risk sensitivity, reinforcement learning, anterior cingulate cortex, inferior  
44 frontal cortex, depression, inattention

45

## 46 **Introduction**

47 Cognitive and neural responses to reward and risk are quintessential to understanding  
48 human behavior. Gambling tasks predominantly form the experimental test beds for measuring  
49 reward and risk processing abilities in humans<sup>1,2</sup>. However, it is widely debated how well these  
50 tasks can separate decision-making based on frequency of gains/losses versus expected value, i.e.  
51 payoff of different choice-sets<sup>1,3,3-12</sup>.

52 For instance, studies that have controlled for gain frequency in the Iowa Gambling Task  
53 (IGT) show that subject choices reflect their gain frequency preferences, which drive relatively  
54 immediate reinforcement based choice behavior, rather than expected values that benefit payoff in  
55 the long-term<sup>13-17</sup>. Additionally, many studies suggest that performance measures from gambling  
56 tasks are influenced by individual differences that are revealed within a reinforcement learning  
57 framework, e.g. sensitivity to rewards and risks, learning rate, and behavioral execution  
58 strategies<sup>18-22</sup>; prior neural studies of decision payoff have not fully accounted for these  
59 differences.

60 In this study, we aimed to address the shortcomings of existing reward processing  
61 assessments in two ways. First, we accommodated for individual gain frequency bias while  
62 assessing advantageous payoff-based decision making. Specifically, we designed a two-choice  
63 paradigm that implements two separate blocks – a  $\Delta_0$ payoff block (baseline block) where two  
64 reward choice-options have equal payoffs and reward variance suitable for measuring the  
65 immediate gain frequency bias, and a  $\Delta$ payoff block (difference block) where the two-choice  
66 options have unequal payoffs suitable for measuring payoff influences. We thereby, teased apart  
67 measurements of immediate gain frequency biased response from long-term payoff (i.e. expected

68 value) based response to understand the distinct cognitive and neural mechanisms underlying  
69 payoff decisions.

70         Second, we accounted for individual differences in reinforcement learning (RL) including  
71 attention to stimuli, sensitivity to rewards and risks, learning rate, and exploration vs. exploitation  
72 based executive policies, for understanding reward functions. In prior work, we have shown that  
73 reward and risk based processing can be explained within RL model frameworks<sup>23–27</sup>. RL models  
74 provide the ability to derive the underlying learning parameters forming the basis for individual  
75 differences in performance, including subjective sensitivity to risky or probabilistic outcomes<sup>24</sup>,  
76 time scale of reward prediction or outcome discounting rate contributing to reward sensitivity,  
77 exploration versus exploitation in individual responses<sup>28</sup>, influence of repeated choices on  
78 learning<sup>29</sup> and levels of attention<sup>30,31</sup>. Uniquely, in this study, we model and account for these RL  
79 parameters while estimating the data-driven neural correlates for payoff relevant decisions.  
80 Finally, we predict individual variations in self-reported mental health based on the cognitive and  
81 neural correlates of payoff relevant responses. We show that payoff relevant neural markers are  
82 sensitive to specific neuropsychiatric symptoms and thereby serve future clinical utility.

83

## 84 **Results**

85

### 86 **Reward paradigm disentangles payoff-based performance from gain frequency bias.**

87         Healthy adult subjects (N = 186, ages 18-80 years, 115 females) performed a two-choice  
88 gambling task, *Lucky Door*, which implemented two distinct blocks of choices; the  $\Delta_0$ payoff block  
89 delivered choice-sets with different gain frequencies but no differences in payoff, while the  
90  $\Delta$ payoff block delivered choice-sets with same gain frequencies as the earlier  $\Delta_0$ payoff block yet  
91 with long-term payoff (i.e. expected value) differences (**Figure 1A**). Specifically, the  $\Delta_0$ payoff  
92 block only varied the gain frequency associated with the choice doors, with one door leading to  
93 70% positive reward outcomes (Rare Loss or RareL door) while the other resulting in 70%  
94 negative reward outcomes (Rare Gain or RareG door), yet maintaining the same reward average  
95 or long-term expected value/ payoff (**Supplementary Table 1**). The  $\Delta$ payoff block was presented  
96 in a random sequence order relative to the  $\Delta_0$ payoff block across subjects. It had the same gain and  
97 loss frequency setup as the  $\Delta_0$ payoff block (choices randomly positioned on the left or right side  
98 of the screen, **Figure 1A**), but the rewards associated with the RareG door resulted in a larger long-  
99 term payoff than the RareL door. Participants executed 40 trials per block. The gain frequency bias  
100 (*Bias*) was computed from the  $\Delta_0$ payoff block as the difference between the proportion of RareL  
101 vs. RareG selections. Thus higher the preference for RareL to RareG door in the  $\Delta_0$ payoff block,  
102 higher is the gain frequency *Bias*. On the other hand, the payoff-based response (*Perf*) was  
103 computed as the difference between the proportion of RareG selections on the  $\Delta$ payoff vs.  
104  $\Delta_0$ payoff block. Therefore higher the preference for RareG door in  $\Delta$ payoff block to RareG door  
105 in the  $\Delta_0$ payoff block, higher is the *Perf*. The RareG door was designed with greater payoff as  
106 choosing this door could selectively suggest payoff-based decision processing in subjects as  
107 opposed to simply choosing based on gain frequency in which case RareL should be preferred.

108 Given our specific focus on understanding advantageous long-term decisions measured by payoff-  
109 based responses (*Perf*), we first wanted to understand which behavioral predictors significantly  
110 predicted *Perf*. We implemented a multivariate regression model of *Perf* using demographic (age,  
111 gender, race, ethnicity, socio-economic status (SES) and mental health (anxiety, depression,  
112 inattention and hyperactivity) predictors as per **Table 1**. Mental health was assessed using self-  
113 reporting questionnaires detailed in our **Methods** section. The model also accounted for individual  
114 gain frequency *Bias* and order of block presentation. The overall *Perf* model was significant  
115 ( $R^2=0.43$ ,  $p<0.0001$ ). Interestingly the only variable that significantly predicted *Perf* was Gain  
116 frequency *Bias* (**Figure 1B**,  $\beta=0.37 \pm 0.04$ ,  $t(151)=9.18$ ,  $p<0.0001$ ,  $f^2=0.58$ ), showing that *Bias* can  
117 confound the understanding of payoff-based performance. Hereafter, we control for *Bias* in all  
118 payoff-relevant analyses below.

119

120 **Reinforcement Learning models capture task-payoff related performance and suggest**  
121 **individually differentiating learning parameters.**

122 We developed a reinforcement learning model for each subject that converged to their  
123 actual payoff-related performance (**Figure 2**). The motivation for building the RL model sprung  
124 from many folds of reasoning. First, it explains the converged behavioral dynamics in each  
125 participant sans experimental trial limitations. This is important since each choice in the task was  
126 associated with a probabilistic reward and subjects were presented with finite number of trials (40  
127 per block), yet we wanted to characterize the stabilized and representative decision-making  
128 dynamics for each subject. Second, it characterizes the individual differences in each participant  
129 in terms of computational parameters that manifest in learning and executive control. We  
130 particularly focused on five key parameters controlling reward processing, risk taking and decision

131 making, which included risk sensitivity factor, temporal reward discount factor, stimulus learning  
132 eligibility factor, inverse exploration index, and stimulus noise index (**Figure 2, Table 1**). Prior  
133 modeling studies have suggested that task behavior can be explained with greater accuracy when  
134 both the expected value (long-term average reward or payoff) and expected risk (reward variance)  
135 are considered for computing the utility that regulates the decisions. The risk sensitivity factor  
136 depicts how a subject trades off the accounting of reward variance from the reward average, higher  
137 factor values indicate risk aversiveness and lower levels indicate risk seeking nature of the subject  
138 (**Table 1**, model  $\alpha$ ). The temporal reward discount factor represents impulse control, with higher  
139 factor values depicting greater control (**Table 1**, model  $\gamma$ ). Stimulus learning eligibility depicts the  
140 effects of repetitive choice on learning the underlying task's reward structure and learning the link  
141 between the stimuli and their associated behavioral responses, lower factor values indicate  
142 increased decay associated with the infrequent choices (**Table 1**, model  $\lambda$ ). The inverse exploration  
143 index marks the exploration/exploitation tradeoff with lower values indicative of greater  
144 exploration (**Table 1**, model  $\beta$ ). Finally, the stimulus noise factor represents the noise in stimulus  
145 representation due to inadequate attention, greater factor values represent greater noise (**Table 1**,  
146  $\sigma$ ). We found that the individual subject RL models fit the actual behavior data significantly well  
147 (**Figure 2B**, Sum of squares cost optimization on the number of selections of each choice-door  
148 option in each block of the experiment, Spearman correlation between model predicted and actual  
149 *Perf*,  $\rho(185)=0.92$ ,  $p<0.0001$ ).

150

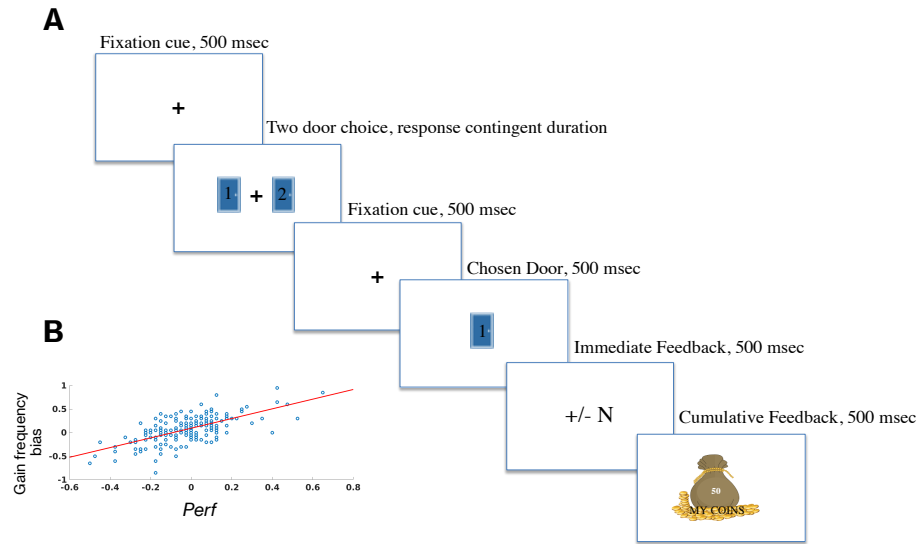

151  
 152 **Figure 1. A) Schematic of the *Lucky Door* Task.** Participants fixated for 0.5 sec, then chose  
 153 from one of two choice doors. Post-response, fixation reappeared for 0.5 sec, followed by  
 154 presentation of the chosen door for 0.5 sec, then immediate gain or loss feedback provided for  
 155 0.5 sec, and finally, cumulative feedback of all gains/losses up to the present trial shown for 0.5  
 156 sec. **B) Significant predictors of payoff-based performance, *Perf*.** Gain frequency *Bias* (top  
 157 panel,  $\beta=0.36 \pm 0.04$ ,  $p<0.0001$ ) significantly predict *Perf*.  
 158  
 159

| <b>Demographics</b>  |                                   | <b>Median <math>\pm</math> MAD</b> |
|----------------------|-----------------------------------|------------------------------------|
| Age                  |                                   | 25.00 $\pm$ 14.87                  |
| Gender n (%)         |                                   |                                    |
|                      | Male                              | 71 (38.17)                         |
|                      | Female                            | 115 (61.83)                        |
| Ethnicity n (%)      |                                   |                                    |
|                      | Caucasian                         | 116 (62.37)                        |
|                      | Black or African American         | 4 (2.15)                           |
|                      | Native Hawaiian, Pacific Islander | 0 (0)                              |
|                      | Asian                             | 37 (19.89)                         |
|                      | American Indian, Alaska Native    | 4 (2.15)                           |
|                      | Multi-racial                      | 12 (6.45)                          |
|                      | Others                            | 12 (6.45)                          |
| Race n (%)           |                                   |                                    |
|                      | Hispanic or Latino                | 25 (13.51)                         |
|                      | Not Hispanic or Latino            | 155 (83.78)                        |
|                      | Unknown                           | 5 (2.70)                           |
| SES                  |                                   | 5.00 $\pm$ 1.34                    |
| <b>Mental Health</b> |                                   | <b>Median <math>\pm</math> MAD</b> |
| Anxiety              |                                   | 3 $\pm$ 2.88                       |
| Depression           |                                   | 3 $\pm$ 2.76                       |
| Inattention          |                                   | 4 $\pm$ 3.99                       |
| Hyperactivity        |                                   | 3 $\pm$ 2.96                       |
| <b>Behavior</b>      |                                   | <b>Median <math>\pm</math> MAD</b> |
| Model $\alpha$       |                                   | 0.87 $\pm$ 0.13                    |



|                 |                   |
|-----------------|-------------------|
| Model $\gamma$  | $0.90 \pm 0.11$   |
| Model $\lambda$ | $0.54 \pm 0.21$   |
| Model $\beta$   | $22.94 \pm 11.63$ |
| Model $\sigma$  | $1.64 \pm 0.23$   |
| Perf            | $-0.02 \pm 0.13$  |
| Bias            | $0.10 \pm 0.21$   |

160  
 161 **Table 1. Subject characteristics.** Median  $\pm$  MAD for subjects demographics variables, mental  
 162 health self-report scores, and parameters from the reinforcement learning models. MAD: median  
 163 absolute deviation, SES: socioeconomic status score. The normal threshold cut-off score for  
 164 mental health symptoms is 5. For the reinforcement learning model, the parameter range was  $\alpha \in$   
 165  $(-1, 1)$ ,  $\gamma \in (0, 1)$ ,  $\lambda \in (0, 1)$ ,  $\beta \in (0, 50]$ ,  $\sigma \in [0.5, 3]$ .  
 166

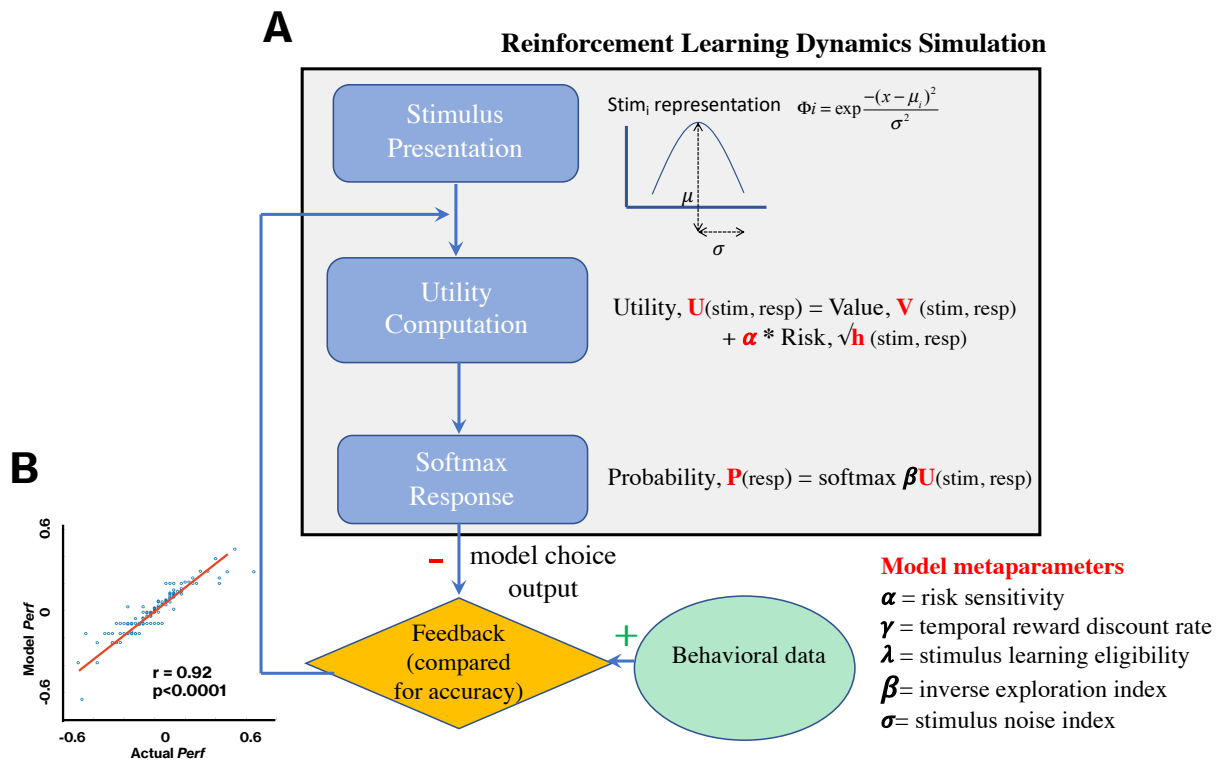

167  
 168 **Figure 2. A) Reinforcement Learning model schematic** representing the stimulus, value  
 169 function and choice selection modules. The model results for number of selections associated with  
 170 each of the choice door stimuli in each task block are compared against the actual selections made  
 171 by each subject, for purposes of model optimization. The model uses the utility, U, associated with  
 172 each choice response for making the decision, where the utility is a function of reward average and  
 173 reward variance associated with choices. The decision in the model is taken using the SoftMax  
 174 probability, P, of making the choices. Model parameters are highlighted as  $\alpha$  (model agent's  
 175 sensitivity to outcome reward variance),  $\gamma$  (temporal reward discounting),  $\lambda$  (influence of repeated  
 176 choice on learning and decision-making),  $\beta$  (agent's exploration and exploitation index), and  $\sigma$   
 177 (noisy stimulus, x, representation from mean,  $\mu$ , due to inadequate attention). **B) Model outcomes**  
 178 **fit the actual behavior data for Perf** (payoff-based decisions, Spearman  $\rho(185) = 0.92$ ,  
 179  $p < 0.0001$ ).

180

181 **Right rostral anterior cingulate cortex and inferior frontal cortex code for decision making**  
182 **payoff.**

183 Participants performed the reward task with simultaneous EEG that was analyzed in the  
184 theta (3-7 Hz), alpha (8-12 Hz), and beta (13-30 Hz) frequency bands in cortical source space  
185 parcellated as per the Desikan-Killiany regions of interest<sup>32</sup>. To identify the neural correlates  
186 underlying expected value i.e. payoff-based performance (*Perf*), we modeled these as predictors  
187 of *Perf* using robust multivariate linear regression accounting for gain frequency *Bias* that  
188 determined *Perf* (**Figure 1**), and the five RL model parameters ( $\alpha$ ,  $\gamma$ ,  $\lambda$ ,  $\beta$  and  $\sigma$ ; **Figure 2**).

189 Neural activations from three relevant trial periods were investigated: immediately post-  
190 presentation of selected choice but prior to reward (0-500 ms selected choice period), during  
191 presentation of trial reward (0-500 ms reward period), and during presentation of the cumulative  
192 reward up to that trial in the trial sequence (0-500 ms cumulative reward period); neural activations  
193 were the relative difference in activity on  $\Delta$ payoff vs.  $\Delta_0$ payoff block RareG trials. Taking the  
194 relative block difference allowed non-task related individual EEG differences to cancel out, and  
195 relative responses to the RareG door were important for analysis because this door choice resulted  
196 in a larger long-term payoff than the other (RareL) door in the  $\Delta$ payoff block. Family-wise error-  
197 rate corrections were applied for multiple comparisons.

198 Independently observed significant neural correlates of *Perf* are shown in **Supplementary Table**  
199 **2**. We further accounted for these multiple independently significant neural predictors within a  
200 unified multivariate model for *Perf* that also included the significant *Bias*, and RL model parameter  
201 covariates. The results of this multivariate model showed theta activity in the right rostral anterior  
202 cingulate cortex (ACC) during the cumulative reward period ( $\beta=-43.74 \pm 13.49$ ,  $t(173)=-3.24$ ,

203  $p=0.001$   $f^2=0.01$ ) and beta activity in the right parsorbitalis region of the inferior frontal cortex  
204 (IFC) also during the cumulative reward period ( $\beta=-74.88 \pm 22.97$ ,  $t(174)=-3.26$ ,  $p=0.001$ ,  $f^2=0.03$ )  
205 as the most significant independent predictors of payoff-based decisions (**Figure 3A-B**); activity  
206 in the selected choice presentation period and the immediate reward period did not survive multiple  
207 comparisons. It is noteworthy that activity that occurs during the cumulative reward feedback is  
208 linked most strongly with performance linked with expected value.

209 Additionally, we checked whether these specific neural activity regressions showed any  
210 interactions with age and gender, but no interactions were found (all  $p>0.55$ ). The scalp  
211 topographic activations corresponding to these neural source profiles are shown in  
212 **Supplementary Figure 1**.

213 Separately, we also investigated the neural correlates for gain *Bias* as differential activity towards  
214 frequent gains versus frequent losses on the  $\Delta_0$ payoff block. We controlled for RL parameters in  
215 these analyses as well and found *Bias* activations to be unique from *Perf*. Predictors of *Bias*  
216 included left superior frontal theta ( $\beta=-48.53 \pm 15.09$ ,  $t(171)=-3.21$ ,  $p=0.001$ ,  $f^2=0.02$ ), and right  
217 rostral ACC alpha ( $\beta=-685.81 \pm 201.26$ ,  $t(170)=-3.41$ ,  $p=0.0008$ ,  $f^2=0.06$ ) during the cumulative  
218 reward feedback period (**Supplementary Figure 2**).

219

## 220 **Neural correlates of payoff decision processes predict subjective mental health.**

221 We next investigated whether the neural correlates of payoff decisions are relevant to  
222 subjective mental health by modeling anxiety, depression, inattention and hyperactivity self-report  
223 scores as the dependent variables in robust multivariate regression models. All demographic  
224 variables (age, gender, race, ethnicity, SES), all RL model parameters ( $\alpha$ ,  $\gamma$ ,  $\lambda$ ,  $\beta$  and  $\sigma$ ), task  
225 performance variables of *Perf* and *Bias* as well as the two cumulative reward-processing neural

226 correlates (right rostral ACC theta; right IFC beta) were included in each model as independent  
227 predictors.

228 The overall model for each symptom score was significant with false discovery rate (fdr,  $p < 0.05$ )  
229 correction applied for multiple comparisons: anxiety ( $R^2 = 0.24$ ,  $p = 0.001$ ), depression ( $R^2 = 0.20$ ,  
230  $p = 0.012$ ), inattention ( $R^2 = 0.19$ ,  $p = 0.03$ ), and hyperactivity ( $R^2 = 0.18$ ,  $p = 0.03$ ).

231 Amongst demographics, age negatively predicted anxiety ( $\beta = -0.02 \pm 0.004$ ,  $t(149) = -5.04$ ,  
232  $p < 0.0001$ ,  $f^2 = 0.17$ ), depression ( $\beta = -0.01 \pm 0.004$ ,  $t(149) = -3.52$ ,  $p = 0.0006$ ,  $f^2 = 0.08$ ) and inattention  
233 ( $\beta = -0.01 \pm 0.004$ ,  $t(142) = -3.69$ ,  $p = 0.0003$ ,  $f^2 = 0.10$ ). Moreover, a multiracial origin negatively  
234 predicted inattention in subjects ( $\beta = -0.65 \pm 0.32$ ,  $t(142) = -2.06$ ,  $p = 0.04$ ,  $f^2$  all races = 0.03). No other  
235 demographics were significant predictors of mental health symptoms. Amongst the RL model  
236 variables, reward discount factor ( $\gamma$ ), which represents impulse control, negatively predicted  
237 inattention ( $\beta = -0.96 \pm 0.48$ ,  $t(142) = -2.02$ ,  $p = 0.04$ ,  $f^2 = 0.03$ ) as well as hyperactivity scores ( $\beta =$   
238  $0.97 \pm 0.44$ ,  $t(149) = -2.20$ ,  $p = 0.03$ ,  $f^2 = 0.04$ ), and the stimulus decay factor positively predicted  
239 hyperactivity ( $\beta = 0.99 \pm 0.50$ ,  $t(149) = 1.98$ ,  $p = 0.049$ ,  $f^2 = 0.03$ ). Notably, neural correlates of payoff  
240 performance also significantly predicted symptom scores: cumulative reward related rostral ACC  
241 theta activity positively predicted depression ( $\beta = 304.83 \pm 153.92$ ,  $t(149) = 1.98$ ,  $p = 0.049$ ,  $f^2 = 0.07$ );  
242 and right IFC beta activity positively predicted inattention ( $\beta = 697.84 \pm 324.08$ ,  $t(142) = 2.15$ ,  
243  $p = 0.03$ ,  $f^2 = 0.03$ , **Figure 3 C-D**). Finally, the overall regression models for depression and  
244 inattention symptom scores were improved when taking the significant neural correlates into  
245 account vs. not (regression models compared with and without neural parameters for Depression:  
246  $F_{stat} = 3.92$ ,  $p = 0.049$ ; Inattention:  $F_{stat} = 4.64$ ,  $p = 0.03$ ).

247

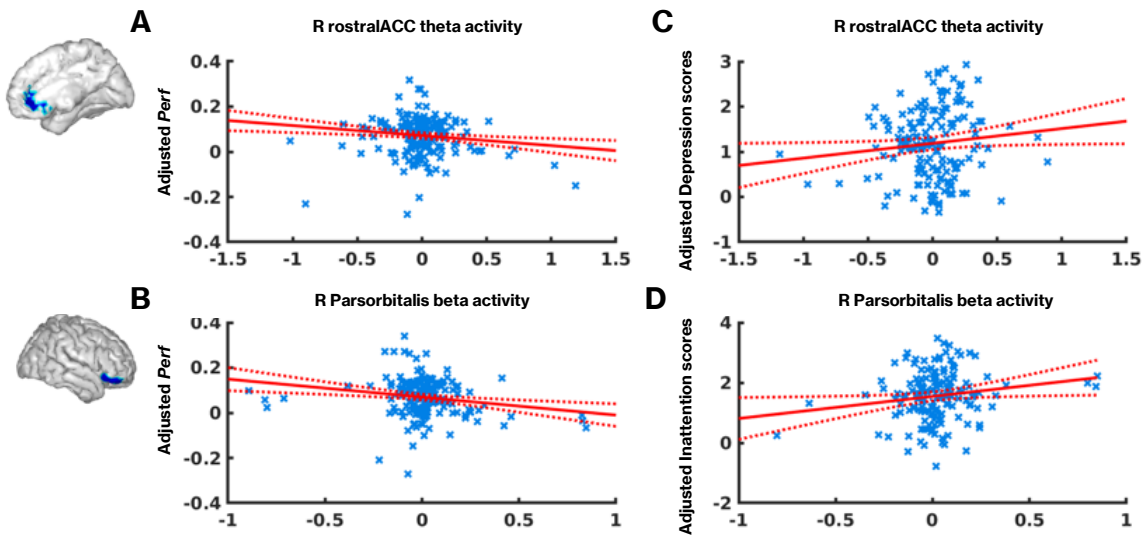

248

249

250

251

252

253

254

255

**Figure 3: Neural correlates of payoff-based decision making in humans.** Payoff based performance is negatively predicted by (A) right rostral anterior cingulate cortex (ACC) theta activity in the cumulative reward period, and by (B) right parsorbitalis (IFC) beta activity in the cumulative reward period. (C) Payoff performance related rostral ACC theta positively predicted depression and (D) parsorbitalis beta predicted inattention symptoms. The scatters are presented on an adjusted axis as obtained from the multivariate robust regression models. The x-axes in all cases are  $10^{-3}$  source activity units.

## 256 **Discussion**

257           Reinforcement learning models suggest human choices ideally tend to maximize long-term  
258 beneficial outcomes<sup>23,24,26,33,34</sup>. However, many existing neuropsychological measures of decision-  
259 making that optimize for long-term payoffs don't reliably estimate the participant's ability to  
260 integrate rewards and make foresighted decisions, and instead suffer from biases to immediate  
261 outcome frequencies<sup>16,19,35,36</sup>. In our paradigm, we can disentangle gain frequency biases from  
262 payoff-based decision-making by introducing a  $\Delta_0$ payoff block with no payoff difference between  
263 choice options wherein decisions are purely based on gain frequency<sup>15</sup>. Comparing choices within  
264 the  $\Delta$ payoff experimental block, designed to have similar reward distribution structure as the  
265  $\Delta_0$ payoff block but differing only on the long-term outcome between options, allows measurement  
266 of individual long-term payoff sensitivity. Therefore, our study by its very design is able to perform  
267 this important distinction to tease apart individual payoff-based performance from bias towards  
268 gain frequency, and further leverage these measures to inform mental health behaviors.

269 The behavioral outcomes of our experiment varied based on individual subject characteristics.  
270 Payoff-based performance was significantly related to individual bias for observed frequency of  
271 gains; this is in line with prior studies of decision-making but wherein gain frequency decisions  
272 are often conflated with expected value<sup>1,15</sup>. We further modeled subjective differences using  
273 reinforcement learning (RL) models, and extracted sensitivity to rewards and risks in the outcomes  
274 ( $\alpha$ ), reward discounting rates through time ( $\gamma$ ), attention levels ( $\sigma$ ), explorative tendency during  
275 behavior ( $\beta$ ), and repetitive behavior effects on general learning dynamics ( $\lambda$ ) to explain each  
276 subject's behavior. Using the RL model outputs, we were able to account for individual differences  
277 when identifying the payoff performance related neural correlates.

278 We focused on three different time periods of the task, the first associated with processing of the  
279 selected choice, the ensuing reward presentation period and the cumulative reward period to  
280 understand how neural dynamics in these periods affect payoff-based performance. The selected  
281 choice period captures the processing associated with presentation of the chosen door after the  
282 actual decision period. We did not analyze the actual decision period since two different choice  
283 options are shown on the screen during this period and the signal associated with every choice  
284 option was difficult to explicitly assess. Accounting for demographics, gain frequency *Bias* and  
285 RL-model informed differences in learning and behavioral execution, the significant neural  
286 correlates of payoff sensitive performance were found in critical frontal executive regions of the  
287 right rostral anterior cingulate cortex (ACC) and inferior frontal cortex (IFC) during the cumulative  
288 reward period. Relatedly, most earlier studies on probabilistic reward processing have suggested  
289 medial prefrontal cortex (mPFC) to be a core region mediating decision performance<sup>1-3,37-39</sup>.  
290 More specifically, analyses showed theta activity in right rostral ACC negatively correlated with  
291 payoff-based performance. This finding is aligned with prior evidence for reward-based theta  
292 processing<sup>40-42</sup> and its widely studied relationship to long-term risk or uncertainty. This may be  
293 one reason why we observe a negative relationship between rostral ACC theta during cumulative  
294 reward presentation and effective payoff, *Perf*, whose magnitude inversely relates to uncertainty  
295 but positively to choice utility<sup>43-46</sup>.  
296 Similarly, right IFC (parsorbitalis) negatively correlated with the payoff performance, specifically  
297 in the beta spectral band during the cumulative reward feedback period. Many inhibitory control  
298 studies suggest that increased beta activity in this region during action stopping plays an important  
299 role in behavioral inhibition. Our results at the least suggest that decisions for advantageous  
300 choices may significantly interact with the stopping circuit for successful behavior<sup>47-50</sup>. Moreover,

301 our findings observed during the cumulative reward feedback period may suggest facilitation of  
302 accurate response with optimal speed and inhibitory control in the next-trial<sup>51</sup>.

303 In our study we also found that neural correlates of payoff-based performance are distinct from  
304 correlates of gain frequency bias. We found the medial prefrontal cortex, especially, left superior  
305 frontal theta and right rostral ACC alpha coded for bias-related activity. These areas had been  
306 previously suggested to play significant roles in probabilistic decision making<sup>52-59</sup> and our study  
307 by its ability to tease apart payoff-performance and bias, is able to also distinguish the underlying  
308 neural correlates.

309 Translational neuroscience studies show that reward based decision processing deficits are found  
310 in depression and in attention disorders, leading to difficulty in reward integration and foresighted  
311 choice-behaviors<sup>23,60-65</sup>. It is precisely such individuals who then focus on the immediate reward  
312 outcome in the short-term, characterized by a prolonged attenuation of temporal discounting of  
313 rewards<sup>66,67</sup>. Interestingly, rostral ACC activity in our paradigm during the cumulative reward  
314 feedback period that is a negative correlate of payoff performance, was a positive predictor  
315 depression scores—a link that is also supported by prior work<sup>68,69</sup>. Related research also suggests  
316 that rostral ACC theta activity is a significant pretreatment marker for depression treatment  
317 outcomes<sup>70</sup>. Additionally, right IFC beta activity during the cumulative reward feedback period  
318 showed a positive relationship to inattention scores, suggesting that decreased activity enables  
319 pursuit for maximal payoff with high attention, possibly by enabling flexibility in stopping  
320 impulsive decisions. These results are still limited by our study in healthy adults and need to be  
321 replicated in clinical populations.

322 Altogether, our study presents the importance of controlling for biases for immediate reward  
323 frequency and individual differences in learning while assessing advantageous, i.e. foresighted



324 decision-making ability in humans. Our findings of payoff-relevant right rostral ACC theta activity  
325 and right IFC beta activity, both in the cumulative reward-related feedback period, are important  
326 for clinical translational application, especially for depression, and attention problems, and also  
327 suggests plausible neural targets for reward processing based interventions.

328

## 329 **Methods**

330

331 **Participants.** 198 adult human subjects (age mean  $\pm$  standard deviation  $35.44 \pm 20.30$  years, range  
332 18-80 years, 115 females) participated in the study. All participants provided written informed  
333 consent for the study protocol approved by the University of California San Diego institutional  
334 review board (UCSD IRB #180140). Twelve of these participants were excluded from the study  
335 as they had a current diagnosis for a psychiatric disorder and current/recent history of psychotropic  
336 medications for a final sample of 186 healthy adult participants. All participants reported  
337 normal/corrected-to-normal vision and hearing and no participant reported color blindness. For  
338 older adults  $>60$  years of age, participants were confirmed to have a Mini-Mental State  
339 Examination (MMSE) score  $>26$  to verify absence of apparent cognitive impairment (Arevalo-  
340 Rodriguez et al. 2015). All data was collected prior to COVID-19 period of restricted research.

341

342 **Surveys.** All participants provided demographic information by self-report including age, gender,  
343 race (in a scale of 1 to 7: Caucasian; Black/African American; Native Hawaiian / Other Pacific  
344 Islander; Asian; American Indian / Alaska Native; More than one race; Unknown or not reported)  
345 and ethnicity; socio-economic status (SES) was measured on the Family Affluence Scale from 1  
346 to 9 (Boudreau and Poulin, 2008), and any current/past history of clinical diagnoses and  
347 medications were reported. For older adults  $>60$  years of age, participants completed the Mini-  
348 Mental State Examination (MMSE) and scored  $>26$  to verify absence of apparent cognitive  
349 impairment<sup>71</sup>. All participants completed subjective mental health self-reports using standard  
350 instruments, ratings of inattention and hyperactivity obtained on the Adult ADHD Rating Scale  
351 (New York University and Massachusetts General Hospital. Adult ADHD-RS-IV with Adult  
352 Prompts. 2003; : 9–10), Generalized Anxiety Disorder 7-item scale GAD-7<sup>72</sup> and depression  
353 symptoms reported on the 9-item Patient Health Questionnaire, PHQ-9<sup>73</sup>. Symptoms for these  
354 psychiatric conditions were measured because they have been related to changes in reward  
355 processing<sup>74–76</sup>.

356

357 **Task Design.** We investigated a two-choice decision-making task that enabled a rapid assessment  
358 and was easy to understand across the adult lifespan. In this task that we refer to as *Lucky Door*,  
359 participants chose between one of two doors, either a rare gain door (RareG, probability for gains  
360  $p=0.3$ , for losses  $p=0.7$ ) or a rare loss door (RareL, probability for losses  $p=0.3$ , for gains  $p=0.7$ ).  
361 Participants used the left and right arrow keys on the keyboard to make their door choice. Door  
362 choice was monitored throughout the task. Additionally, in two separate blocks, we investigated  
363 whether the overall expected value (payoff) of the choice door can influence individual behavior.  
364 In the baseline block with  $\Delta_{\text{payoff}}$  (no-payoff difference), the two choice doors did not differ in  
365 payoff (RareL door,  $p=0.3$  for -70 coins and  $p=0.7$  for +30 coins, payoff=0; RareG door,  $p=0.3$  for  
366 +70 coins and  $p=0.7$  for -30 coins, payoff=0). In the experimental difference block with  $\Delta_{\text{payoff}}$   
367 (payoff difference), expected value or payoff was greater for the RareG door ( $p=0.3$  for +60 coins,  
368  $p=0.7$  for -20 coins, payoff=+40) than for the RareL door ( $p=0.3$  for -60 coins,  $p=0.7$  for +20 coins;  
369 payoff=-40). Manipulation of payoff, with greater expected value tied to the RareG door, allowed  
370 for investigating individual propensities to prioritize long-term (or cumulative) vs. short-term (or  
371 immediate) rewards. The RareG door was assigned greater payoff because choosing this door  
372 could selectively suggest payoff-based decision processing in subjects as opposed to simply  
373 choosing based on gain frequency in which case RareL should be preferred. 40 trials were  
374 presented per block and block order was randomized across participants; two practice trials

375 preceded the main  $\Delta$ payoff /  $\Delta_0$ payoff blocks. **Figure 1A** shows a schematic of the task stimulus  
376 sequence and **Figure 1B** shows the reward distribution that was shuffled and updated after every  
377 10 trials had been sampled from that set.

378 The *Lucky Door* task was deployed in Unity as part of the assessment suite on the *BrainE*  
379 (short for Brain Engagement) platform<sup>77</sup>. The Lab Streaming Layer (LSL<sup>78</sup>) protocol was used to  
380 time-stamp each stimulus/response event during the task. Study participants engaged with the  
381 assessment on a Windows 10 laptop sitting at a comfortable viewing distance.

382  
383 **Electroencephalography (EEG).** EEG data was collected simultaneous to the *Lucky Door* task  
384 using a 24-channel SMARTING device with a semi-dry and wireless electrode layout (Next  
385 EEG—new human interface, MBT). Data were acquired at 500 Hz sampling frequency at 24-bit  
386 resolution. Cognitive event markers were integrated using LSL and data files were stored in xdf  
387 format.

388  
389 **Behavioral analyses.** Task speeds were calculated as  $\log(1/RT)$ , where RT is response time in  
390 seconds. We computed the PayOff sensitive performance response (Perf) as the difference in  
391 proportion selection of the RareG door between the  $\Delta$ payoff and the  $\Delta_0$ payoff blocks; RareG vs.  
392 RareL EVs differed only in the  $\Delta$ payoff block. We computed Gain frequency bias (Bias) as the  
393 difference in proportion selection between the RareG and RareL doors in the  $\Delta_0$ payoff block where  
394 the payoff for both the doors was the same. While Perf is indicative of subjective payoff based  
395 selection of advantageous choices, Bias is indicative of inherent valence based selection of choices.  
396 For N fraction of responses in each block, we calculated:

397  
398 
$$Perf = N_{\text{exptRareG}} - N_{\text{baseRareG}} \tag{1}$$
  
399 
$$Bias = N_{\text{baseRareG}} - N_{\text{baseRareL}}$$

400 **Reinforcement Learning (RL) Model.** We simulated a RL model<sup>24,29</sup> to estimate 5 different  
401 parameters for each participant, including, risk sensitivity ( $\alpha$ ); reward discount factor ( $\gamma$ ); stimulus  
402 learning eligibility ( $\lambda$ ); exploration index ( $\beta$ ); stimulus noise ( $\sigma$ ).

403 The risk sensitivity parameter ( $\alpha$ ) measures how much the expected uncertainty associated with  
404 the door is accounted for in the computation of utility for decision making, the smaller the  
405 parameter value  $\alpha \in (-1, 1)$ ,  $\alpha \rightarrow -1$  the higher is risk seeking, while a larger value,  $\alpha \rightarrow 1$  indicates  
406 high risk aversiveness.

407 The reward discounting factor ( $\gamma$ ) represents discounting of rewards through time in subjects,  
408 lower values  $\gamma \in (0, 1)$ ,  $\gamma \rightarrow 0$  suggest impulsiveness in decisions accounting for immediate rewards  
409 alone for decision processing while higher values,  $\gamma \rightarrow 1$  suggest long term integration of rewards  
410 for decisions.

411 The learning eligibility trace factor ( $\lambda$ ) represents the extent of decay associated with the infrequent  
412 presentation of stimulus that affects the learning updates, lower values  $\lambda \in (0, 1)$ ,  $\lambda \rightarrow 0$  suggest  
413 heavy loss of stimulus information for not being presented for a trial thereby causing lossy learning  
414 update, while higher values,  $\lambda \rightarrow 1$  suggest conservation of stimulus information for learning in  
415 any trial.

416 The exploration index ( $\beta$ ) measures the randomness associated with choice selection policy, lower  
417 values  $\beta \in (0, 50]$ ,  $\beta \rightarrow 0$  suggest exploration while higher values,  $\beta \rightarrow \infty$  suggest exploitation  
418 based on utility for decision making.

419 The stimulus noise ( $\sigma$ ) measures the randomness associated with stimulus representation as  
420 attended and perceived by the subject, lower values,  $\sigma \in [0.5 \ 3]$ ,  $\sigma \rightarrow 0$  suggest sharper  
421 representation while higher values,  $\sigma \rightarrow \infty$  suggest noisier representation.

422 The simulation agent had reward distributions as in the real experiment but scaled down  
423 by multiplying with a factor 0.1, and varying with blocks ( $\Delta\text{payoff}$ ,  $\Delta_0\text{payoff}$ ) that were randomly  
424 ordered. There were as high as 10000 trials in each block for letting model performance converge.  
425

426 The agent has to choose between two doors each of which (stimulus,  $s$ ) was represented by a radial  
427 basis function ( $\Phi_i$ ) as below:

$$428 \quad \Phi_s = \exp \frac{-(x - \mu_s)^2}{\sigma^2} \quad (2)$$

429 Here, the  $\mu_s$  and  $\sigma$  denotes the mean ( $s \in [1 \ 2]$ ; door1 = 1; door2 = 2) and standard deviation  
430 (stimulus noise), respectively.

431  
432 The door stimulus is multiplied with the weight matrix  $wv$  for computing its value function,  $Q$ , and  
433  $wr$  for constructing its risk function,  $\sqrt{h}$ .  
434

435 Utility associated with any state at a trial,  $t$ , is the combination of value and risk function<sup>79,80</sup>, where  
436 the risk function is modulated by a risk sensitivity factor  $\alpha$ . Higher the  $\alpha$ , higher the risk  
437 aversiveness of the subject.

$$438 \quad U(s, t) = Q(s, t) - \alpha \sqrt{h(s, t)} \quad \text{where}$$

$$439 \quad \begin{aligned} Q(s, t) &= wv(s, t)\Phi(s) \\ h(s, t) &= wr(s, t)\Phi(s) \end{aligned} \quad (3)$$

440  
441 The door choice selection is performed using the SoftMax principle defined as below. According  
442 to SoftMax, the probability for choosing a door at trial,  $t$ , is  $P(s, t)$ :

$$443 \quad P(s, t) = \frac{\exp(\beta U(s, t))}{\sum_{i=1}^n \exp(\beta U(i, t))} \quad (4)$$

444 Here,  $n$  is the total number of doors available, and  $\beta$  is the exploration index. Values of  $\beta$  tending  
445 to 0 make the choices almost equiprobable and is more exploratory whereas the  $\beta$  tending to  $\infty$   
446 makes the choice selection identical to exploitative choice selection.

447 After choice selection, the weight functions are updated using principles below. The choice value  
448 function  $Q$  at trial  $t+1$  for door,  $s$ , may be expressed as,

$$449 \quad Q_{t+1}(s, t) = Q_t(s, t) + \eta_Q \delta \Phi' e \quad (5)$$

450 where  $\eta_Q$  is the learning rate of the value function ( $0 < \eta_Q < 1$ ) for the stimulus variable,  $\Phi'(s) =$

451  $\Phi(s)e$ , i.e., scaled by current eligibility trace,  $e$ , associated with the stimulus. The variable  $e$  is  
452 decayed to  $e * \lambda * \gamma$  at every trial, where  $\lambda$  is the inverse decay parameter, and  $\gamma$  is the reward discount  
453 factor, for all the stimuli, but for the currently chosen  $e$ , it is further facilitated by an addition of 1,  
454  $e(t+1) = e(t) + 1$ .

455  $\Delta$  is the temporal difference error represented as

$$456 \quad \delta = r + \gamma \max_s Q(s',t) - Q_t(s,t) \quad (6)$$

457 where  $r$  is the reward associated with taking an action,  $a$ , for stimulus,  $s$ , at time,  $t$ , and  $\gamma$  is the  
458 reward discount factor. Similar to the value function, the risk function  $h$  has an incremental update  
459 as defined by the below equation. Optimizing the risk function in addition to the value function is  
460 shown to capture human behavior well in a variety of cognitive tasks involving reward-punishment  
461 sensitivity, risk sensitivity, and time scale of reward prediction<sup>24,81</sup>.

$$462 \quad h_{t+1}(s,t) = h_t(s,t) + \eta_h \xi \Phi' e \quad (7)$$

463 where  $\eta_h$  is the learning rate of the risk function ( $0 < \eta_h < 1$ ), and  $\xi$  is the risk prediction error  
464 expressed by the below equation.

$$465 \quad \xi = \delta^2 - h_t(s,a,t) \quad (8)$$

467 For simplicity, we model as  $\eta_h = \eta_Q = 0.1$  as an initial optimization for our subjects for  $\eta$  provided  
468 a median of 0.1. The weights  $wv$  and  $wr$  are set to a small random number from set  $[-0.0005 \ 0.0005]$   
469 at trial = 1. The weights are normalized by dividing by their norm.

470  
471 The cost function optimizes the frequency of selections of rare gain and rare loss options in  
472  $\Delta_0$  payoff and  $\Delta$  payoff blocks for every subject after running the simulation agent for 10 instances  
473 of twenty thousand trials each, and inferring the optimal parameters for every participant in our  
474 study using *fmincon* function in MATLAB. Cost function = sum of squares of the difference actual  
475 ( Proportion# RareG<sub>expt</sub> + Proportion# RareL<sub>expt</sub> + Proportion# RareG<sub>base</sub> + Proportion# RareL<sub>base</sub>)  
476 – simulated actual ( Proportion# RareG<sub>expt</sub> + Proportion# RareL<sub>expt</sub> + Proportion# RareG<sub>base</sub> +  
477 Proportion# RareL<sub>base</sub>). Optimization is carried out for the 5 parameters, risk sensitivity ( $\alpha$ ); reward  
478 discount factor ( $\gamma$ ); stimulus decay ( $\lambda$ ); exploration index ( $\beta$ ); stimulus noise ( $\sigma$ ), using *fmincon*.  
479 We ran *fmincon*() 100 times to choose the parameter set with least cost for any subject. The  
480 simulated Perf measures correlated with the actual values significantly (Spearman correlation,  
481  $\rho(185) = 0.92$ ,  $p < 0.0001$ , **Figure 2B**).

482  
483 We also performed sensitivity analyses for our models, by systematically varying one of the five  
484 parameters at a time for about 200 different initial points linearly spaced within the boundary  
485 specific for each parameter boundary( $\alpha$ ) =  $[-0.99 \ 0.99]$ , boundary( $\gamma$ ) =  $[0.01 \ 0.99]$ , boundary( $\lambda$ ) =  
486  $[0.01 \ 0.999]$ , boundary( $\beta$ ) =  $[0.001 \ 5]$ , boundary( $\sigma$ ) =  $[0.5 \ 3]$ . The other 4 parameters were kept at  
487 the median computed over the set of subjective parameter values each optimized using *fmincon*()

488 as mentioned above (**Supplementary Figure 3**). These analyses confirmed *Perf* and *Bias*  
489 measures to be sensitive to the range of the five core RL model parameters.

490

#### 491 **Neural data processing.**

492 We applied a uniform processing pipeline to all EEG data acquired simultaneous to the  
493 *Lucky Door* task. This included: 1) data pre-processing, 2) computing event related spectral  
494 perturbations (ERSP) for all channels, and 3) cortical source localization of the EEG data filtered  
495 within relevant theta, alpha and beta frequency bands.

496

497 1) Data preprocessing was conducted using the EEGLAB toolbox in MATLAB<sup>82</sup>. EEG data was  
498 resampled at 250 Hz, and filtered in the 1-45 Hz range to exclude ultraslow DC drifts at <1Hz and  
499 high-frequency noise produced by muscle movements and external electrical sources at >45Hz.  
500 EEG data were average referenced and epoched to the chosen door presentation during the task,  
501 in the -.5 sec to +1.5 sec time window (**Figure 1**). Any missing channel data (one channel each in  
502 6 participants) was spherically interpolated to nearest neighbors. Epoches data were cleaned using  
503 the `autorej` function in EEGLAB to remove noisy trials (>5sd outliers rejected over max 8  
504 iterations;  $0.91 \pm 2.65\%$  of trials rejected per participant). EEG data were further cleaned by  
505 excluding signals estimated to be originating from non-brain sources, such as electrooculographic,  
506 electromyographic or unknown sources, using the Sparse Bayesian learning (SBL) algorithm<sup>83,84</sup>,  
507 <https://github.com/aojeda/PEB>) explained below in the cortical source localization section.

508

509 2) For ERSP calculations, we performed time-frequency decomposition of the epoched data using  
510 the continuous wavelet transform (`cwt`) function in MATLAB's signal processing toolbox.  
511 Baseline time-frequency (TF) data in the -250 ms to -50 ms time window prior to chosen door  
512 presentation were subtracted from the epoched trials (at each frequency) to observe the event-  
513 related synchronization (ERS) and event-related desynchronization (ERD) modulations<sup>85</sup>. Time-  
514 frequency decompositions of the chosen door evoked neural activity showed that most electrodes  
515 had significant ERS and ERD signatures at the channel level, with ERS predominant in the  
516 theta/alpha frequencies and ERD predominant in the beta frequency range (**Supplementary**  
517 **Figure 1**).

518

519 3) Cortical source localization was performed to map the underlying neural source activations for  
520 the ERSPs using the block-Sparse Bayesian learning (SBL) algorithm<sup>83,84</sup> implemented in a  
521 recursive fashion. This is a two-step algorithm in which the first-step is equivalent to low-  
522 resolution electromagnetic tomography (LORETA)<sup>86</sup>. LORETA estimates sources subject to  
523 smoothness constraints, i.e. nearby sources tend to be co-activated, which may produce source  
524 estimates with a high number of false positives that are not biologically plausible. To guard against  
525 this, SBL applies sparsity constraints in the second step wherein blocks of irrelevant sources are  
526 pruned. Source space activity signals were estimated and then their root mean squares were  
527 partitioned into (1) regions of interest (ROIs) based on the standard 68 brain region Desikan-  
528 Killiany atlas<sup>32</sup> shown in **Supplementary Figure 4**, using the Colin-27 head model<sup>87</sup> and (2)  
529 artifact sources contributing to EEG noise from non-brain sources such as electrooculographic,  
530 electromyographic or unknown sources; activations from non-brain sources were removed to clean  
531 the EEG data. Cleaned subject-wise trial-averaged EEG data were then specifically filtered in theta  
532 (3-7 Hz), alpha (8-12 Hz), and beta (13-30 Hz) bands and separately source localized in each of  
533 these bands to estimate their cortical ROI source signals. The source signal envelopes were



534 computed in MatLab (envelop function) by a spline interpolation over the local maxima separated  
535 by at least one time sample; we used this spectral amplitude signal for all neural analyses presented  
536 here. We focused on selected choice based processes in the 0-500 ms period in all frequency bands,  
537 reward processes during 0-500 ms after immediate reward presentation, and 0-500 ms after  
538 cumulative reward presentation (**Figure 1**).

539

## 540 **Statistical Analyses**

541 We fit robust multivariate linear regression models in MATLAB to investigate the  
542 behavioral relationships between the *Perf* measure and demographic variables – age, sex, race,  
543 ethnicity and SES, after controlling for *Bias* and order of block presentation. The response variable  
544 was log-transformed for normality and we identified significant factors contributing to the main  
545 effects. Similarly, we investigated the relationships between each of the mental health factors –  
546 anxiety, depression, inattention, hyperactivity and *Perf* measure after controlling for *Bias* and  
547 demographic variables. For regression models, we report the overall model  $R^2$  and p-value, and  
548 individual variable  $\beta$  coefficients, t-statistic, degrees of freedom, and p-values. Effect sizes (Selya  
549 et al. 2012), 0.02 small, 0.15 medium, 0.35 large were calculated as  $f^2 = (R^2_{\text{FullModel}} -$   
550  $R^2_{\text{RestrictedModel}})/(1 - R^2_{\text{FullModel}})$ .

551 Channel-wise theta, alpha, beta ERS and ERD modulations for significant spectral activity  
552 were computed relative to baseline by first processing for any outliers; any activations greater than  
553 5MAD from the median were removed from further analyses. The significant average activity  
554 across all trials were found by performing t-tests ( $p < 0.05$ ) across subjects, followed by false  
555 discovery rate (FDR,  $\alpha = 0.05$ ) corrections applied across the three dimensions of time,  
556 frequency, and channels<sup>88</sup>.

557 For computing source level activity correlates of the behavioral *Perf* measure, we first  
558 found the difference in RareG door specific neural activations between  $\Delta_{\text{payoff}}$  and  $\Delta_{0\text{payoff}}$   
559 blocks in three frequency bands – theta, alpha and beta and in three trial periods – selected choice  
560 (before reward), reward and cumulative reward time periods. We again used robust linear  
561 regression fits for identifying individual ROIs that relate to the *Perf* measure accounting for *Bias*  
562 that significantly affect the payoff decisions, as well as the five RL model parameters ( $\alpha$ ,  $\gamma$ ,  $\lambda$ ,  $\beta$   
563 and  $\sigma$ ). The results were family-wise error rate corrected for multiple comparisons for 3 trial  
564 periods and 3 frequency bands (FWER correction,  $p < 0.0055$ ). The independently identified ROIs  
565 (**Supplementary Table 2**) were further factored in a unified multivariate linear regression model  
566 to account for comparisons across ROIs; significant ROIs in this multivariate model were reported  
567 ( $p < 0.05$ ) after controlling for *Bias*, and the five RL model parameters. Similar steps were used for  
568 computing the source level activity correlates for the gain *Bias* measure. We first found the  
569 difference in RareL and RareG door specific neural activations in the  $\Delta_{0\text{payoff}}$  blocks in three  
570 frequency bands – theta, alpha and beta and in the three trial periods corresponding to selected  
571 choice, reward and cumulative reward. We then used robust linear regression fits for identifying  
572 individual ROI activations that relate to the *Bias* measure accounting for *Perf* that significantly  
573 affect the payoff decisions, as well as the five RL model parameters ( $\alpha$ ,  $\gamma$ ,  $\lambda$ ,  $\beta$  and  $\sigma$ ). The results  
574 were family-wise error rate corrected for multiple comparisons for 3 trial periods and 3 frequency  
575 bands (FWER correction,  $p < 0.0055$ ). The independently identified ROIs were further factored in  
576 a unified multivariate linear regression model to account for comparisons across ROIs; significant  
577 ROIs in this multivariate model were reported ( $p < 0.05$ ) after controlling for *Perf*, and the five RL  
578 model parameters (**Supplementary Figure 2**).

579 Additionally, we used robust multivariate linear regressions to model the self-reported symptoms  
580 of Anxiety, Depression, Inattention, Hyperactivity using predictors of demographic variables,  
581 *Perf*, *Bias*, RL model parameters along with the identified neural correlates of *Perf* above.  
582 Adjusted responses from robust multivariate models were plotted using the `plotAdjustedResponse`  
583 function in MATLAB.



584 **Supplementary material**

585

586

|                 | $\Delta$ payoff |         | $\Delta_0$ payoff |         |
|-----------------|-----------------|---------|-------------------|---------|
|                 | RareL           | RareG   | RareL             | RareG   |
| <b>1</b>        | 20              | -20     | 30                | -30     |
| <b>2</b>        | 20              | -20     | 30                | -30     |
| <b>3</b>        | 20              | -20     | 30                | -30     |
| <b>4</b>        | 20              | -20     | 30                | -30     |
| <b>5</b>        | 20              | -20     | 30                | -30     |
| <b>6</b>        | 20              | -20     | 30                | -30     |
| <b>7</b>        | 20              | -20     | 30                | -30     |
| <b>8</b>        | -60             | 60      | -70               | 70      |
| <b>9</b>        | -60             | 60      | -70               | 70      |
| <b>10</b>       | -60             | 60      | -70               | 70      |
| <b>sum</b>      | -40             | 40      | 0                 | 0       |
| <b>average</b>  | -4              | 4       | 0                 | 0       |
| <b>variance</b> | 1493.33         | 1493.33 | 2333.33           | 2333.33 |

587

588 **Supplementary Table 1. Reward distributions for the door choices in the  $\Delta$ payoff and**

589  **$\Delta_0$ payoff blocks.** The two door choices in either block were RareG (rare gains and frequent losses)

590 and RareL (rare losses and frequent gains). RareG/RareL distributions had the same sum, average

591 and variance in the  $\Delta_0$ payoff block, and different sum and averages but same variance in the

592  $\Delta$ payoff block. Payoff (expected value) for RareG/RareL were the same in the  $\Delta_0$ payoff block and

593 greater for RareG relative to RareL in the  $\Delta$ payoff block.

594

595  
596

| Epoch           | Freq  | ROI                        | $\beta$ | $\beta$ SE | tstat | pValue   |
|-----------------|-------|----------------------------|---------|------------|-------|----------|
| Selected choice | alpha | caudalanteriorcingulate R  | -184.58 | 60.32      | -3.06 | 2.58E-03 |
| Selected choice | beta  | lingual L                  | -29.87  | 10.34      | -2.89 | 4.35E-03 |
| Reward          | beta  | superiorfrontal L          | -80.41  | 28.57      | -2.81 | 5.48E-03 |
| Reward          | beta  | superiorfrontal R          | -115.88 | 34.43      | -3.37 | 9.46E-04 |
| CumuReward      | theta | rostralanteriorcingulate R | -44.41  | 13.71      | -3.24 | 1.44E-03 |
| CumuReward      | beta  | parsorbitalis R            | -79.67  | 23.05      | -3.46 | 6.96E-04 |
| CumuReward      | beta  | superiorfrontal L          | -95.63  | 32.76      | -2.92 | 4.00E-03 |
| CumuReward      | beta  | superiorfrontal R          | -105.19 | 33.21      | -3.17 | 1.83E-03 |
| CumuReward      | beta  | supramarginal R            | -38.85  | 7.46       | -5.21 | 5.44E-07 |

597  
598  
599  
600  
601

**Supplementary Table 2:** ROIs sensitive to Payoff-based decision-making performance (*Perf*) during selected choice presentation: 0-500 ms selected choice period; Reward: 0-500 ms immediate reward period and CumuReward: 0-500 cumulative reward period.

602

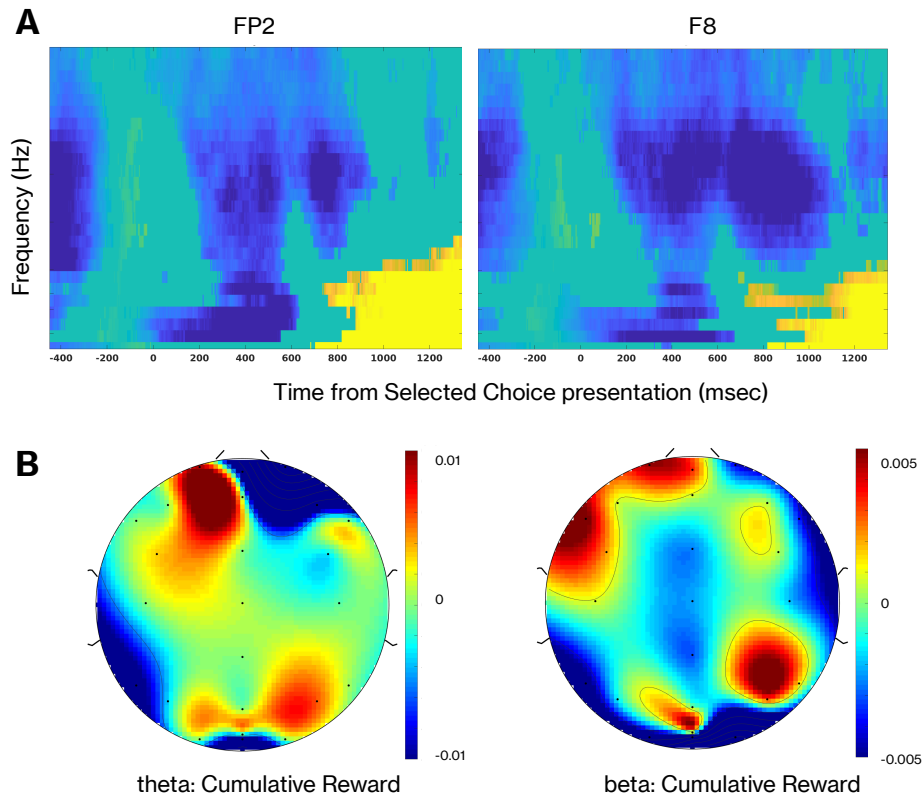

603  
604  
605  
606  
607  
608  
609  
610

**Supplementary Figure 1:** (A) Grand-averaged spectral perturbations at scalp channels FP2 and F8 representing the event-related synchronizations and desynchronizations, closest in proximity to the identified *Perf* activations in the right rostral anterior cingulate cortex, and right pars opercularis, respectively. (B) Corresponding *Perf* scalp topographies, as differences in RareG trial activations between the  $\Delta$ payoff and the  $\Delta$ payoff blocks for the relevant (500 ms-averaged) theta and beta activations are shown.

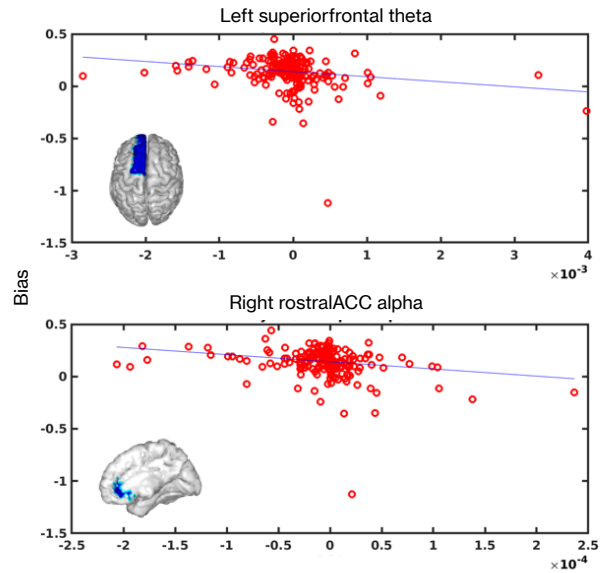

611  
612 **Supplementary Figure 2: Neural correlates of Gain frequency bias-based decision making.**  
613 Bias based performance was negatively predicted by left superior frontal cortex theta activity in  
614 the cumulative reward period, and by right rostral anterior cingulate cortex (ACC) alpha activity  
615 in the cumulative reward period.  
616  
617

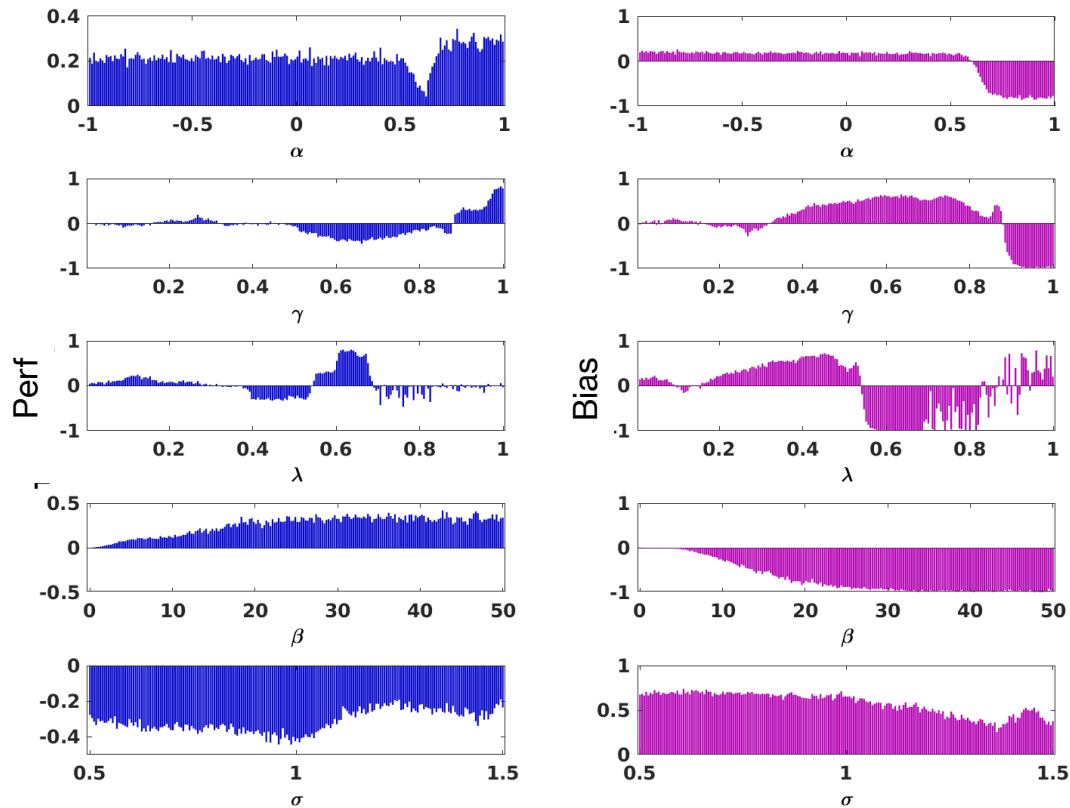

618  
619  
620  
621  
622  
623  
624  
625  
626

**Supplementary Figure 3.** Sensitivity analysis results for each model meta-parameter,  $\alpha$ ,  $\gamma$ ,  $\lambda$ ,  $\beta$ ,  $\sigma$ , presented in rows and their simulation-derived model *Perf* and gain frequency *Bias* outcomes presented as corresponding columns. Only one parameter was varied at a time while the other parameters were held to their population median.

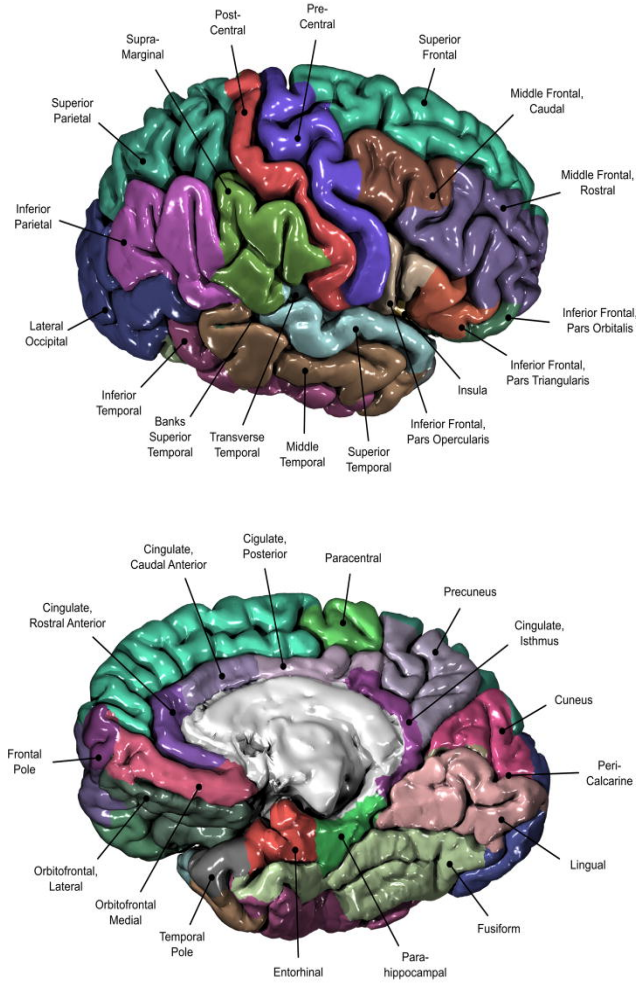

627  
628  
629  
630  
631

**Supplementary Figure 4.** Cortical source regions as per the Desikan-Killiany atlas (Desikan *et al.*, 2006).

## 632 **Acknowledgements**

633 This work was supported by University of California San Diego (UCSD) lab start-up funds (DR,  
634 JM), the Interdisciplinary Research Fellowship in NeuroAIDS (PB: R25MH081482), the Brain &  
635 Behavior Research Fund (PB), the Kavli Foundation (PB, JM), and the Sanford Institute for  
636 Empathy and Compassion (JM, PB). We thank Alankar Misra for software development of the  
637 *BrainE* software and several UCSD undergraduate students who assisted with data collection. The  
638 *BrainE* software is copyrighted for commercial use (Regents of the University of California  
639 Copyright #SD2018-816) and free for research and educational purposes. We thank Sabyasachi  
640 Shivkumar and Vignesh Muralidharan for their helpful feedback on the study analysis.

641

## 642 **Data Availability**

643 A part of the dataset used in this study is available on the open-access repository link:  
644 10.5281/zenodo.4088951

645

## 646 **Conflict of Interest.**

647 The authors declare no conflict of interest.

648

## 649 **References**

- 650 1. Bechara, A., Damasio, H., Tranel, D. & Damasio, A. R. Deciding advantageously before  
651 knowing the advantageous strategy. *Science* **275**, 1293–1295 (1997).
- 652 2. Brevers, D., Bechara, A., Cleeremans, A. & Noel, X. Iowa Gambling Task (IGT): twenty  
653 years after – gambling disorder and IGT. *Front. Psychol.* **4**, (2013).
- 654 3. Bechara, A., Tranel, D. & Damasio, H. Characterization of the decision-making deficit of  
655 patients with ventromedial prefrontal cortex lesions. *Brain* **123**, 2189–2202 (2000).
- 656 4. Bembich, S. *et al.* Differences in time course activation of dorsolateral prefrontal cortex  
657 associated with low or high risk choices in a gambling task. *Frontiers in human*  
658 *neuroscience* **8**, 464 (2014).
- 659 5. Christakou, A., Brammer, M., Giampietro, V. & Rubia, K. Right ventromedial and  
660 dorsolateral prefrontal cortices mediate adaptive decisions under ambiguity by integrating  
661 choice utility and outcome evaluation. *Journal of Neuroscience* **29**, 11020–11028 (2009).

- 662 6. Garon, N., Moore, C. & Waschbusch, D. A. Decision Making in Children With ADHD Only,  
663 ADHD-Anxious/Depressed, and Control Children Using a Child Version of the Iowa  
664 Gambling Task. *J Atten Disord* **9**, 607–619 (2006).
- 665 7. Gupta, R., Koscik, T. R., Bechara, A. & Tranel, D. The amygdala and decision-making.  
666 *Neuropsychologia* **49**, 760–766 (2011).
- 667 8. Mueller, E. M., Nguyen, J., Ray, W. J. & Borkovec, T. D. Future-oriented decision-making  
668 in Generalized Anxiety Disorder is evident across different versions of the Iowa Gambling  
669 Task. *Journal of Behavior Therapy and Experimental Psychiatry* **41**, 165–171 (2010).
- 670 9. Must, A., Horvath, S., Nemeth, V. L. & Janka, Z. The Iowa Gambling Task in depression –  
671 what have we learned about sub-optimal decision-making strategies? *Frontiers in psychology*  
672 **4**, 1–6 (2013).
- 673 10. Oberg, S. A., Christie, G. J. & Tata, M. S. Problem gamblers exhibit reward hypersensitivity  
674 in medial frontal cortex during gambling. *Neuropsychologia* **49**, 3768–3775 (2011).
- 675 11. Roca, M. *et al.* Executive Functions in Pathologic Gamblers Selected in an Ecologic Setting.  
676 *Cognitive and Behavioral Neurology* **21**, 1–4 (2008).
- 677 12. Woodrow, A. *et al.* Decision-making ability in psychosis: a systematic review and meta-  
678 analysis of the magnitude, specificity and correlates of impaired performance on the Iowa  
679 and Cambridge Gambling Tasks. *Psychological Medicine* **49**, 32–48 (2019).
- 680 13. Chiu, Y.-C. & Lin, C.-H. Is deck C an advantageous deck in the Iowa Gambling Task?  
681 *Behavioral and Brain Functions* **3**, 37 (2007).
- 682 14. Chiu, Y.-C. *et al.* Immediate gain is long-term loss: Are there foresighted decision makers in  
683 the Iowa Gambling Task? *Behavioral and Brain Functions* **4**, 13 (2008).



- 684 15. Lin, C., Chiu, Y. & Huang, J. Gain-loss frequency and final outcome in the Soochow  
685 Gambling Task: A Reassessment. *Behavioral and Brain Functions* **5**, 1–9 (2009).
- 686 16. Napoli, A. & Fum, D. Rewards and punishments in iterated decision making: An explanation  
687 for the frequency of the contingent event effect. in *10th International Conference on*  
688 *Cognitive Modeling. Philadelphia, PA* (Citeseer, 2010).
- 689 17. Singh, V. & Khan, A. Decision making in the reward and punishment variants of the Iowa  
690 gambling task: evidence of “foresight” or “framing”? *Frontiers in neuroscience* **6**, 107  
691 (2012).
- 692 18. Franken, I. H. & Muris, P. Individual differences in decision-making. *Personality and*  
693 *Individual Differences* **39**, 991–998 (2005).
- 694 19. Furl, B. A. The influence of individual differences on the Iowa Gambling Task and real-  
695 world decision making. (Wake Forest University, 2010).
- 696 20. Harman, J. L. Individual differences in need for cognition and decision making in the Iowa  
697 Gambling Task. *Personality and individual differences* **51**, 112–116 (2011).
- 698 21. Newman, L. I., Polk, T. A. & Preston, S. D. Revealing individual differences in the Iowa  
699 Gambling Task. in 1067–1072 (Cognitive Science Society Austin, TX, 2008).
- 700 22. Weller, J. A., Levin, I. P. & Bechara, A. Do individual differences in Iowa Gambling Task  
701 performance predict adaptive decision making for risky gains and losses? *Journal of Clinical*  
702 *and Experimental Neuropsychology* **32**, 141–150 (2010).
- 703 23. Balasubramani, P. P. & Chakravarthy, V. S. Bipolar oscillations between positive and  
704 negative mood states in a computational model of Basal Ganglia. *Cogn Neurodyn* (2019)  
705 doi:10.1007/s11571-019-09564-7.

- 706 24. Balasubramani, P. P., Chakravarthy, S., Ravindran, B. & Moustafa, A. A. An extended  
707 reinforcement learning model of basal ganglia to understand the contributions of serotonin  
708 and dopamine in risk-based decision making, reward prediction, and punishment learning.  
709 *Frontiers in Computational Neuroscience* **8**, 47 (2014).
- 710 25. Chakravarthy, V. S., Balasubramani, P. P., Mandali, A., Jahanshahi, M. & Moustafa, A. A.  
711 The many facets of dopamine: Toward an integrative theory of the role of dopamine in  
712 managing the body's energy resources. *Physiology & behavior* (2018).
- 713 26. Gupta, A., Balasubramani, P. P. & Chakravarthy, S. Computational model of precision grip  
714 in Parkinson's disease: A Utility based approach. *Frontiers in Computational Neuroscience*  
715 **7**, (2013).
- 716 27. Muralidharan, V., Balasubramani, P. P., Chakravarthy, V. S., Lewis, S. J. & Moustafa, A. A.  
717 A computational model of altered gait patterns in parkinson's disease patients negotiating  
718 narrow doorways. *Frontiers in computational neuroscience* **7**, 190 (2014).
- 719 28. Doya, K. Metalearning and neuromodulation. *Neural networks* **15**, 495–506 (2002).
- 720 29. Sutton, R. S. & Barto, A. G. *Reinforcement Learning: An Introduction. Adaptive*  
721 *Computations and Machine Learning*. (MIT Press/Bradford, 1998).
- 722 30. Denison, R. N., Adler, W. T., Carrasco, M. & Ma, W. J. Humans incorporate attention-  
723 dependent uncertainty into perceptual decisions and confidence. *PNAS* **115**, 11090–11095  
724 (2018).
- 725 31. Roelfsema, P. R. & Ooyen, A. van. Attention-gated reinforcement learning of internal  
726 representations for classification. *Neural computation* **17**, 2176–2214 (2005).
- 727 32. Desikan, R. S. *et al.* An automated labeling system for subdividing the human cerebral  
728 cortex on MRI scans into gyral based regions of interest. *Neuroimage* **31**, 968–980 (2006).

- 729 33. Balasubramani, P. P., Chakravarthy, V. S., Ali, M., Ravindran, B. & Moustafa, A. A.  
730 Identifying the Basal Ganglia Network Model Markers for Medication-Induced Impulsivity  
731 in Parkinson's Disease Patients. *PLoS One* **10**, e0127542 (2015).
- 732 34. Balasubramani, P. P., Moreno-Bote, R. & Hayden, B. Y. Using a Simple Neural Network to  
733 Delineate Some Principles of Distributed Economic Choice. *Frontiers in Computational*  
734 *Neuroscience* **12**, 22 (2018).
- 735 35. Gansler, D. A., Jerram, M. W., Vannorsdall, T. D. & Schretlen, D. J. Comparing alternative  
736 metrics to assess performance on the Iowa Gambling Task. *Journal of Clinical and*  
737 *Experimental Neuropsychology* **33**, 1040–1048 (2011).
- 738 36. Stocco, A., Fum, D. & Napoli, A. Dissociable processes underlying decisions in the Iowa  
739 Gambling Task: a new integrative framework. *Behavioral and Brain Functions* **5**, 1–12  
740 (2009).
- 741 37. Balasubramani, P. P. & Hayden, B. Overlapping neural processes for stopping and economic  
742 choice in orbitofrontal cortex. *bioRxiv* 304709 (2018).
- 743 38. Kennerley, S. W., Behrens, T. E. & Wallis, J. D. Double dissociation of value computations  
744 in orbitofrontal and anterior cingulate neurons. *Nature neuroscience* **14**, 1581 (2011).
- 745 39. Moccia, L. *et al.* Neural correlates of cognitive control in gambling disorder: a systematic  
746 review of fMRI studies. *Neuroscience and Biobehavioral Reviews* **78**, 104–116 (2017).
- 747 40. Cavanagh, J. F., Frank, M. J., Klein, T. J. & Allen, J. J. Frontal theta links prediction errors  
748 to behavioral adaptation in reinforcement learning. *Neuroimage* **49**, 3198–3209 (2010).
- 749 41. Christie, G. J. & Tata, M. S. Right frontal cortex generates reward-related theta-band  
750 oscillatory activity. *Neuroimage* **48**, 415–422 (2009).

- 751 42. Zavala, B. *et al.* Cognitive control involves theta power within trials and beta power across  
752 trials in the prefrontal-subthalamic network. *Brain* **141**, 3361–3376 (2018).
- 753 43. Behrens, T. E. J., Woolrich, M. W., Walton, M. E. & Rushworth, M. F. S. Learning the value  
754 of information in an uncertain world. *Nature Neuroscience* **10**, 1214–1221 (2007).
- 755 44. Krain, A. L., Wilson, A. M., Arbuckle, R., Castellanos, F. X. & Milham, M. P. Distinct  
756 neural mechanisms of risk and ambiguity: A meta-analysis of decision-making. *NeuroImage*  
757 **32**, 477–484 (2006).
- 758 45. Paulus, M. P. & Frank, L. R. Anterior cingulate activity modulates nonlinear decision weight  
759 function of uncertain prospects. *Neuroimage* **30**, 668–677 (2006).
- 760 46. Preuschoff, K., Bossaerts, P. & Quartz, S. R. Neural differentiation of expected reward and  
761 risk in human subcortical structures. *Neuron* **51**, 381–90 (2006).
- 762 47. Aron, A. R. *et al.* Converging Evidence for a Fronto-Basal-Ganglia Network for Inhibitory  
763 Control of Action and Cognition. *Journal of Neuroscience* **27**, 11860–11864 (2007).
- 764 48. Hampshire, A., Chamberlain, S. R., Monti, M. M., Duncan, J. & Owen, A. M. The role of the  
765 right inferior frontal gyrus: inhibition and attentional control. *NeuroImage* **50**, (2010).
- 766 49. Muralidharan, V., Yu, X., Cohen, M. X. & Aron, A. R. Preparing to stop action increases  
767 beta band power in contralateral sensorimotor cortex. *Journal of cognitive neuroscience* **31**,  
768 657–668 (2019).
- 769 50. Picazio, S. *et al.* Prefrontal Control over Motor Cortex Cycles at Beta Frequency during  
770 Movement Inhibition. *Curr Biol* **24**, 2940–2945 (2014).
- 771 51. Tops, M. & Boksem, M. A. S. *A potential role of the inferior frontal gyrus and anterior*  
772 *insula in cognitive control, brain rhythms, and event-related potentials. Front. Psychol.* **2**  
773 *(330)*. (2011).

- 774 52. Gehring, W. J. & Willoughby, A. R. The medial frontal cortex and the rapid processing of  
775 monetary gains and losses. *Science* **295**, 2279–2282 (2002).
- 776 53. Janssen, D. J. C., Poljac, E. & Bekkering, H. Binary sensitivity of theta activity for gain and  
777 loss when monitoring parametric prediction errors. *Social Cognitive and Affective*  
778 *Neuroscience* **11**, 1280–1289 (2016).
- 779 54. van Noordt, S. & Segalowitz, S. J. Performance monitoring and the medial prefrontal cortex:  
780 a review of individual differences and context effects as a window on self-regulation. *Front.*  
781 *Hum. Neurosci.* **6**, (2012).
- 782 55. Rogers, R. D. *et al.* Distinct portions of anterior cingulate cortex and medial prefrontal cortex  
783 are activated by reward processing in separable phases of decision-making cognition.  
784 *Biological psychiatry* **55**, 594–602 (2004).
- 785 56. Sallet, J. *et al.* Expectations, gains, and losses in the anterior cingulate cortex. *Cognitive,*  
786 *Affective, & Behavioral Neuroscience* **7**, 327–336 (2007).
- 787 57. Schutter, D. J. L. G., de Haan, E. H. F. & van Honk, J. Anterior asymmetrical alpha activity  
788 predicts Iowa gambling performance: distinctly but reversed. *Neuropsychologia* **42**, 939–943  
789 (2004).
- 790 58. Shenhav, A., Botvinick, M. M. & Cohen, J. D. The expected value of control: an integrative  
791 theory of anterior cingulate cortex function. *Neuron* **79**, 217–240 (2013).
- 792 59. Telpaz, A. & Yechiam, E. Contrasting losses and gains increases the predictability of  
793 behavior by frontal EEG asymmetry. *Front. Behav. Neurosci.* **8**, (2014).
- 794 60. Balasubramani, P. P., Chakravarthy, V. S., Ali, M., Ravindran, B. & Moustafa, A. A.  
795 Identifying the Basal Ganglia Network Model Markers for Medication-Induced Impulsivity  
796 in Parkinson’s Disease Patients. *PLoS One* **10**, (2015).

- 797 61. Gradin, V. B. *et al.* Expected value and prediction error abnormalities in depression and  
798 schizophrenia. *Brain* **134**, 1751–1764 (2011).
- 799 62. Groen, Y., Gaastra, G. F., Lewis-Evans, B. & Tucha, O. Risky behavior in gambling tasks in  
800 individuals with ADHD—a systematic literature review. *PLoS One* **8**, e74909 (2013).
- 801 63. Miller, W. R. & Seligman, M. E. Depression and the perception of reinforcement. *Journal of*  
802 *Abnormal Psychology* **82**, 62–73 (1973).
- 803 64. Silvetti, M., Wiersema, J. R., Sonuga-Barke, E. & Verguts, T. Deficient reinforcement  
804 learning in medial frontal cortex as a model of dopamine-related motivational deficits in  
805 ADHD. *Neural networks* **46**, 199–209 (2013).
- 806 65. Ziegler, S., Pedersen, M. L., Mowinckel, A. M. & Biele, G. Modelling ADHD: A review of  
807 ADHD theories through their predictions for computational models of decision-making and  
808 reinforcement learning. *Neuroscience & Biobehavioral Reviews* **71**, 633–656 (2016).
- 809 66. Eshel, N. & Roiser, J. P. Reward and punishment processing in depression. *Biological*  
810 *psychiatry* **68**, 118–124 (2010).
- 811 67. Pizzagalli, D. A., Sherwood, R. J., Henriques, J. B. & Davidson, R. J. Frontal brain  
812 asymmetry and reward responsiveness: a source-localization study. *Psychological Science*  
813 **16**, 805–813 (2005).
- 814 68. Boes, A. D., McCormick, L. M., Coryell, W. H. & Nopoulos, P. Rostral Anterior Cingulate  
815 Cortex Volume Correlates with Depressed Mood in Normal Healthy Children. *Biological*  
816 *Psychiatry* **63**, 391–397 (2008).
- 817 69. Yoshimura, S. *et al.* Rostral anterior cingulate cortex activity mediates the relationship  
818 between the depressive symptoms and the medial prefrontal cortex activity. *Journal of*  
819 *Affective Disorders* **122**, 76–85 (2010).

- 820 70. Pizzagalli, D. A. *et al.* Pretreatment Rostral Anterior Cingulate Cortex Theta Activity in  
821 Relation to Symptom Improvement in Depression: A Randomized Clinical Trial. *JAMA*  
822 *Psychiatry* **75**, 547–554 (2018).
- 823 71. Arevalo-Rodriguez, I. *et al.* Mini-Mental State Examination (MMSE) for the detection of  
824 Alzheimer’s disease and other dementias in people with mild cognitive impairment (MCI).  
825 *Cochrane Database of Systematic Reviews* (2015).
- 826 72. Spitzer, R. L., Kroenke, K., Williams, J. B. W. & Loewe, B. A Brief Measure for Assessing  
827 Generalized Anxiety Disorder: The GAD-7. *Archives of internal medicine* **166**, 1092–1097  
828 (2006).
- 829 73. Kroenke, K., Spitzer, R. L. & Williams, J. B. W. The PHQ-9: Validity of a Brief Depression  
830 Severity Measure. *Journal of general internal medicine* **16**, 606–613 (2001).
- 831 74. Admon, R. & Pizzagalli, D. A. Dysfunctional reward processing in depression. *Current*  
832 *Opinion in Psychology* **4**, 114–118 (2015).
- 833 75. Dillon, D. G. *et al.* Peril and pleasure: An RDOC-inspired examination of threat responses  
834 and reward processing in anxiety and depression. *Depression and anxiety* **31**, 233–249  
835 (2014).
- 836 76. Luman, M., Tripp, G. & Scheres, A. Identifying the neurobiology of altered reinforcement  
837 sensitivity in ADHD: A review and research agenda. *Neuroscience & Biobehavioral Reviews*  
838 **34**, 744–754 (2010).
- 839 77. Balasubramani, P. P. *et al.* Mapping Cognitive Brain Functions at Scale. *NeuroImage*  
840 117641 (2020).
- 841 78. Kothe, C., Medine, D., Boulay, C., Grivich, M. & Stenner, T. ‘*Lab Streaming Layer*’  
842 *Copyright*. (2019).

- 843 79. Bell, D. E. Risk, return, and utility. *Management science* **41**, 23–30 (1995).
- 844 80. d’Acromont, M., Lu, Z.-L., Li, X., Van der Linden, M. & Bechara, A. Neural correlates of  
845 risk prediction error during reinforcement learning in humans. *Neuroimage* **47**, 1929–1939  
846 (2009).
- 847 81. Balasubramani, P. P., Chakravarthy, S., Ravindran, B. & Moustafa, A. A. A network model  
848 of basal ganglia for understanding the roles of dopamine and serotonin in reward-  
849 punishment-risk based decision making. *Name: Frontiers in Computational Neuroscience* **9**,  
850 76 (2015).
- 851 82. Delorme, A. & Makeig, S. EEGLAB: an open source toolbox for analysis of single-trial EEG  
852 dynamics including independent component analysis. *Journal of Neuroscience Methods* **134**,  
853 9–21 (2004).
- 854 83. Ojeda, A., Kreutz-Delgado, K. & Mullen, T. Fast and robust Block-Sparse Bayesian learning  
855 for EEG source imaging. *Neuroimage* **174**, 449–462 (2018).
- 856 84. Ojeda, A., Klug, M., Kreutz-Delgado, K., Gramann, K. & Mishra, J. A Bayesian framework  
857 for unifying data cleaning, source separation and imaging of electroencephalographic  
858 signals. *bioRxiv* 559450 (2019) doi:10.1101/559450.
- 859 85. Pfurtscheller, G. EEG event - related desynchronization (ERD) and event - related  
860 synchronization (ERS). *Electroencephalography: Basic Principles, Clinical Applications*  
861 *and Related Fields* 958–967 (1999).
- 862 86. Pascual-Marqui, R. D., Michel, C. M. & Lehmann, D. Low resolution electromagnetic  
863 tomography: A new method for localizing electrical activity in the brain. *International*  
864 *Journal of Psychophysiology* **18**, 49–65 (1994).



- 865 87. Holmes, C. J. *et al.* Enhancement of MR Images Using Registration for Signal Averaging.  
866 *Journal of Computer Assisted Tomography* **22**, 324–333 (1998).
- 867 88. Genovese, C. R., Lazar, N. A. & Nichols, T. Thresholding of Statistical Maps in Functional  
868 Neuroimaging Using the False Discovery Rate. *NeuroImage* **15**, 870–878 (2002).
- 869
